# Supplementary material for: Silent progression of brain atrophy in aquaporin-4 antibody-positive neuromyelitis optica spectrum disorder
Source: HighWire-hosted journal article supplement (doi:10.1136/jnnp-2021-326386), 2021-08-06
Supplement: jnnp-2021-326386supp002_data_supplement.pdf [file jnnp-2021-326386supp002_data_supplement.pdf]

Supplemental table 2. Details of ANCOVA analysis in each study

|                                                                          | Number of patients<br>(AQPAD+NMOSD vs MS) | <i>P</i> value                       |              |
|--------------------------------------------------------------------------|-------------------------------------------|--------------------------------------|--------------|
|                                                                          |                                           | of the parallel<br>slopes assumption | after ANCOVA |
| <b>NBV in study 1</b> using controlled for factors significant different |                                           |                                      |              |
| OCB included                                                             | 27 vs 49                                  | 0.80                                 | 0.24         |
| OCB excluded                                                             | 36 vs 60                                  | 0.64                                 | 0.45         |
| <b>NGV in study 1</b> using controlled for factors significant different |                                           |                                      |              |
| OCB included                                                             | 27 vs 49                                  | 0.99                                 | 0.53         |
| OCB excluded                                                             | 36 vs 60                                  | 0.70                                 | 0.82         |
| <b>NWV in study 1</b> using controlled for factors significant different |                                           |                                      |              |
| OCB included                                                             | 27 vs 49                                  | 0.24                                 | 0.061        |
| OCB excluded                                                             | 36 vs 60                                  | 0.30                                 | 0.091        |
| <b>NBV in study 2</b> using controlled for factors significant different |                                           |                                      |              |
| OCB included                                                             | 19 vs 36                                  | 0.64                                 | 0.18         |
| OCB excluded                                                             | 27 vs 45                                  | 0.073                                | 0.29         |
| <b>NGV in study 2</b> using controlled for factors significant different |                                           |                                      |              |
| OCB included                                                             | 19 vs 36                                  | 0.93                                 | 0.25         |
| OCB excluded                                                             | 27 vs 45                                  | 0.19                                 | 0.34         |
| <b>NWV in study 2</b> using controlled for factors significant different |                                           |                                      |              |
| OCB included                                                             | 19 vs 36                                  | 0.030*                               | Not obtained |
| OCB excluded                                                             | 27 vs 45                                  | 0.002*                               | Not obtained |

|                                                                          |              |          |      |      |
|--------------------------------------------------------------------------|--------------|----------|------|------|
| <b>NBV in study 3</b> using controlled for factors significant different |              |          |      |      |
|                                                                          | OCB included | 18 vs 20 | 0.31 | 0.31 |
|                                                                          | OCB excluded | 20 vs 20 | 0.65 | 0.13 |
| <b>NGV in study 3</b> using controlled for factors significant different |              |          |      |      |
|                                                                          | OCB included | 18 vs 20 | 0.15 | 0.34 |
|                                                                          | OCB excluded | 20 vs 20 | 0.63 | 0.79 |
| <b>NWV in study 3</b> using controlled for factors significant different |              |          |      |      |
|                                                                          | OCB included | 18 vs 20 | 0.80 | 0.96 |
|                                                                          | OCB excluded | 20 vs 20 | 0.97 | 0.85 |

\* $P < 0.05$ .

ANCOVA: an analysis of covariance; AQP4+NMOSD: anti-aquaporin-4 antibody-positive neuromyelitis optica spectrum disorder disease; DMD: disease modifying drug; MS: multiple sclerosis. NBV: normalized brain volume; NGV: normalized grey matter volume; NLV: normalized lesion volume; NWV: normalized white matter volume; OCB: oligoclonal bands.

We performed with or without some significant different items because the number of samples were changed due to them.
